# Supplementary material for: Combining Cardiorespiratory Signals and Video-Based Actigraphy for Classifying Preterm Infant Sleep States
Source: MDPI journal article supplement (doi:10.3390/children10111792), 2023-11-07
Supplement: s1 [file s1]

## Supplementary materials

**Table S1 : ECG and HRV features**

| NR    | Feature               | Description                                                                                                            |
|-------|-----------------------|------------------------------------------------------------------------------------------------------------------------|
| 0     | BpE                   | Beats per Epoch                                                                                                        |
| 1,2   | LL, aLL               | Line Length/mean Line Length                                                                                           |
| 3-6   | NNx                   | The number of pairs of successive RR intervals that differ by more than 10, 20, 30 or 50 ms of a defined window length |
| 7-10  | pNNx                  | The proportion of NNx divided by the total number of R-R intervals of a defined window length                          |
| 11    | RMSSD                 | Root mean square of successive differences between adjacent R-R intervals of a defined window length                   |
| 12    | SDALL                 | Standard derivation of averaged line length                                                                            |
| 13    | SDANN                 | Standard derivation of averaged NN intervals                                                                           |
| 14    | SDLL                  | Standard derivation of line length                                                                                     |
| 15    | SDNN                  | The standard deviation of normal to normal R-R intervals of a defined window length                                    |
| 16    | HF                    | The power of the high-frequency band between 0.15-0.4 Hz of a defined window size                                      |
| 17    | HFnorm                | HF power in normalized units $HF/(Total\ Power-VLF) \times 100$                                                        |
| 18    | LF                    | The power of the low-frequency band between 0.04-0.15 Hz of a defined window size                                      |
| 19    | LFnorm                | LF power in normalized units $LF/(Total\ Power-VLF) \times 100$                                                        |
| 20    | LF/HF                 | Ratio LF/HF                                                                                                            |
| 21    | pHF <sub>1</sub>      | The power of the high-frequency band between 0.4-0.7 Hz                                                                |
| 22    | pHF <sub>1</sub> norm | pHF <sub>1</sub> power in normalized units $pHF_1/(Total\ Power-VLF) \times 100$                                       |
| 23    | TotPow                | Total power or variance of NN intervals of a defined window size                                                       |
| 24    | pHF <sub>2</sub>      | The power of the high-frequency band between 0.7-1.5 Hz                                                                |
| 25    | pHF <sub>2</sub> norm | pHF <sub>2</sub> power in normalized units $pHF_2/(Total\ Power-VLF) \times 100$                                       |
| 26    | VLF                   | The power of the very-low-frequency band between 0.003-0.04 Hz of a defined window size.                               |
| 27,28 | SEN, QSE              | Sample entropy / Quadratic sample entropy                                                                              |
| 29    | SEAUC                 | Sample entropy area under the curve                                                                                    |
| 30    | pDEC                  | The percentage of HR decelerations                                                                                     |
| 31    | SDDec                 | Magnitude of HR deceleration                                                                                           |
| 32,33 | LZNN,LZECG            | Lempel-Ziv complexity measure on HRV and ECG                                                                           |

**Table S2 : Respiratory features**

| NR | Feature            | Description                                                                                             |
|----|--------------------|---------------------------------------------------------------------------------------------------------|
| 0  | VLF                | The logarithm of the spectral power in the very low frequency band between 0.01 and 0.3 Hz              |
| 1  | LF                 | The logarithm of the spectral power in the low frequency band between 0.56 and 0.3 Hz                   |
| 2  | HF                 | The logarithm of the spectral power in the high frequency band between 0.56 and 1.1 Hz                  |
| 3  | VLF/HF             | The ratio between VLF and HF spectral powers                                                            |
| 4  | LF/HF              | The ratio between LF and HF spectral powers                                                             |
| 5  | VLFnorm            | VLF power in normalized units of respiration, $VLF/TotPow \times 100$                                   |
| 6  | LFnorm             | LF power in normalized units of respiration, $LF/(TotPow-VLF) \times 100$                               |
| 7  | HFnorm             | HF respiration power in normalized units, $HF/(TotPow-VLF) \times 100$ of the respiration               |
| 8  | TotPow             | The total power of the respiration frequency spectrum                                                   |
| 9  | Resp_Var           | Variance of respiration                                                                                 |
| 10 | Sampen             | The sample entropy of respiration                                                                       |
| 11 | Resp_freq          | The spectrum the dominant frequency                                                                     |
| 12 | Power of resp_freq | The logarithm of the spectrum the dominant frequency power                                              |
| 13 | NR_breaths         | The number of breaths within epoch                                                                      |
| 14 | Rate               | The median of frequencies                                                                               |
| 15 | Rate_std           | The standard deviation of frequencies                                                                   |
| 16 | Rate_std log       | The logarithm of breath per min                                                                         |
| 17 | Rate delta         | Relative change of frequency in 1/second                                                                |
| 18 | Duty cycle         | Duty cycle of breathing                                                                                 |
| 19 | Amp ratio          | Average amplitude ratio                                                                                 |
| 20 | Amp ratio std      | The standard deviation of amplitude ratio                                                               |
| 21 | Amp ratio delta    | The delta of amplitude ratio                                                                            |
| 22 | Peak sdm           | The amplitudes of respiratory peaks                                                                     |
| 23 | Tough sdm          | The amplitudes of respiratory troughs                                                                   |
| 24 | Peak apen          | The approximate entropy of the peak                                                                     |
| 25 | Tough apen         | The approximate entropy of the tough                                                                    |
| 26 | Breath volume      | The median respiratory volume (expressed by respiratory effort area) measured during breathing cycles   |
| 27 | Breath fr          | The median breath volume over time                                                                      |
| 28 | Inhale volume      | The median respiratory volume (expressed by respiratory effort area) measured during inhalation periods |
| 29 | Exhale volume      | The median respiratory volume (expressed by respiratory effort area) measured during exhalation periods |
| 30 | Inhale fr          | The median respiratory flow rate during inhalation periods                                              |
| 31 | Exhale fr          | The median respiratory flow rate during exhalation periods                                              |
| 32 | PT distance        | The ratio of the median peak-to-trough distance to peak-to-trough interquartile difference              |
| 33 | PT ratio median    | The logarithm of the median respiratory peak-to-trough ratio                                            |
| 34 | PT ratio std       | The logarithm of the standard deviation respiratory peak-to-trough ratio                                |
| 35 | In_ex_fr ratio     | The ratio of the inhalation and the exhalation over time                                                |
| 36 | In_ex_time ratio   | The ratio of inhalation and the exhalation time ratio                                                   |
| 37 | Brbr corr mean     | The mean of breath-by-breath correlation                                                                |
| 38 | Brbr corr max      | The max of breath-by-breath correlation                                                                 |
| 39 | Brbr corr min      | The min of breath-by-breath correlation                                                                 |
| 40 | Brbr corr std      | The standard deviation of breath-by-breath correlation                                                  |

**Table S3. Cardiorespiratory interaction (CRI) features**

| NR | Feature   | Description                                                                                                             |
|----|-----------|-------------------------------------------------------------------------------------------------------------------------|
| 0  | CRI_Dm    | Mean degree of VG network                                                                                               |
| 1  | CRI_Dsd   | Standard degree of VG network.                                                                                          |
| 2  | CRI_Assr  | The assortative coefficient that measures assortative mixing by degree and represents the skewness of node connections. |
| 3  | CRI_CCm   | The average of clustering coefficient over all nodes.                                                                   |
| 4  | CRI_CCstd | The standard deviation of clustering coefficient values                                                                 |
| 5  | CRI_se    | The sample entropy of the degree of the nodes                                                                           |
| 6  | CRI_Ddm   | Mean degree of DVG network                                                                                              |
| 7  | CRI_Ddsd  | Standard degree of DVG network                                                                                          |

**Table S4 : Motion features**

| NR  | Feature                 | Description                                                                                                                                |
|-----|-------------------------|--------------------------------------------------------------------------------------------------------------------------------------------|
| 0   | Motion <sub>mean</sub>  | The mean value of motion that was extracted based on ECG signal                                                                            |
| 1   | Motion <sub>std</sub>   | The standard value of motion that was extracted based on ECG signal                                                                        |
| 2   | Motion <sub>sum</sub>   | The sum of motion value that was extracted based on ECG signal                                                                             |
| 3   | Motion <sub>count</sub> | The number of motion value that were larger than zeros                                                                                     |
| 4-7 | Motion <sub>Px</sub>    | The number of motions that were larger than the x (x=25,50,75,95) percent of motion values that were extracted based on respiratory signal |
